# Supplementary material for: Evaluation of Nd0.8−xSr0.2CaxCoO3−δ(x = 0, 0.05, 0.1, 0.15, 0.2) as a cathode material for intermediate-temperature solid oxide fuel cells
Source: Royal Society of Chemistry journal article supplement (doi:10.1039/d2ra02546a), 2022-01-01
Supplement: d2ra02546a1.pdf [file d2ra02546a1.pdf]

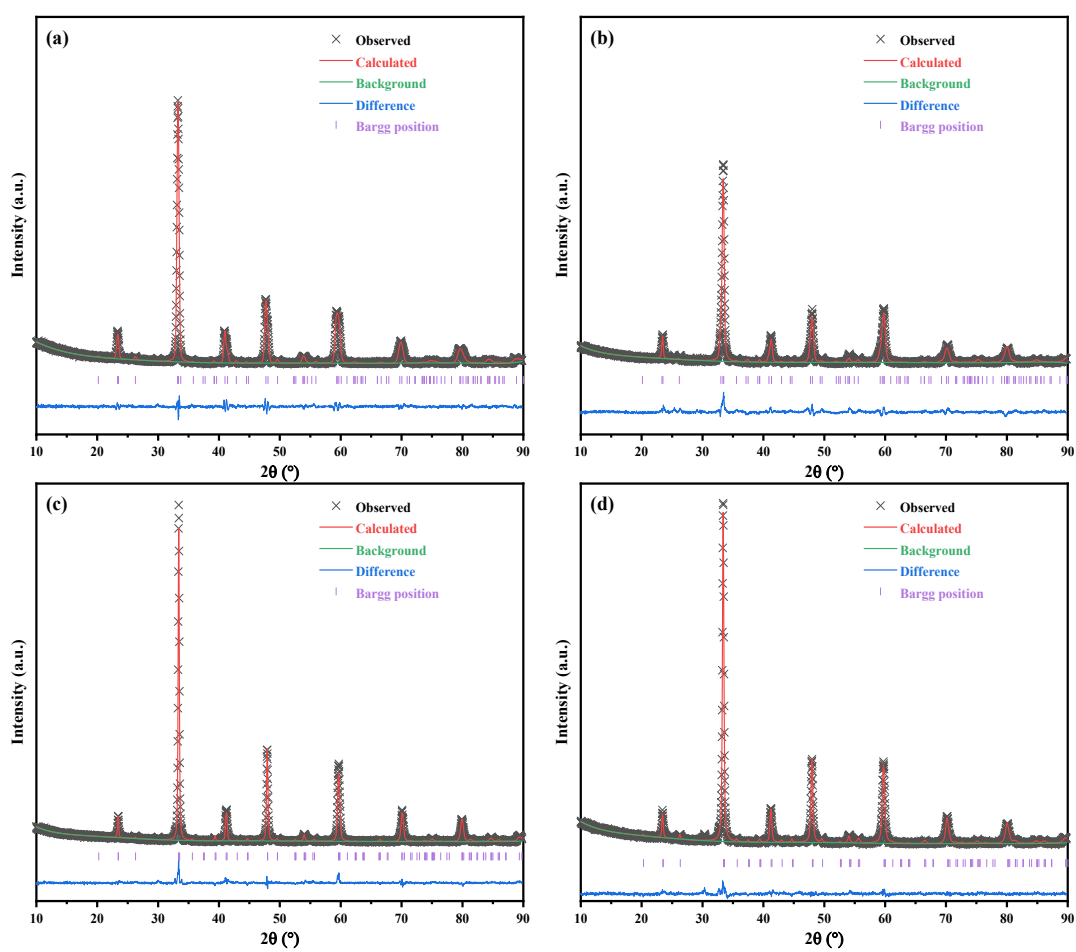

Fig.S1 Rietveld refined XRD of NSC<sub>x</sub>C: (a) NSC; (b) NSC<sub>0.05</sub>C; (c) NSC<sub>0.15</sub>C;  
(d) NSC<sub>0.2</sub>C

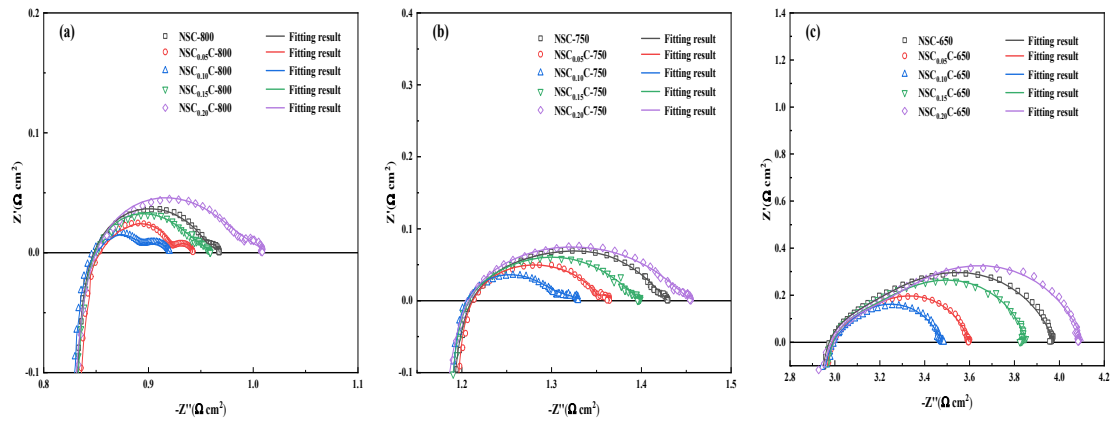

Fig.S2 Nyquist diagram of NSC<sub>x</sub>C (a) 800 °C; (b) 750 °C; (c) 700 °C

Table S1 Thermal expansion coefficient of NSC<sub>x</sub>C at different temperatures

| Sample                | CTE( $\times 10^{-6}$ °C) |           |            |            |            |
|-----------------------|---------------------------|-----------|------------|------------|------------|
|                       | 35~800 °C                 | 35~200 °C | 200~400 °C | 400~600 °C | 600~800 °C |
| NSC                   | 24.2049                   | 18.1394   | 25.9635    | 25.8948    | 25.7603    |
| NSC <sub>0.05</sub> C | 22.5204                   | 18.8576   | 22.4666    | 23.7632    | 24.3532    |
| NSC <sub>0.1</sub> C  | 21.7031                   | 17.1650   | 21.6936    | 23.0238    | 24.1359    |
| NSC <sub>0.15</sub> C | 21.2729                   | 16.7099   | 20.4958    | 22.5887    | 24.0989    |
| NSC <sub>0.2</sub> C  | 19.7623                   | 16.8623   | 17.8104    | 19.9381    | 23.9310    |

Table S2 The binding energy of  $O_{\text{moisture}}$ ,  $O_{\text{adsorbed}}$ ,  $O_{\text{vacancy}}$ ,  $O_{\text{lattice}}$  and the ratio of  $(O_{\text{adsorbed}}+O_{\text{vacancy}})/O_{\text{lattice}}$ .

| Sample                | $O_{\text{moisture}}$ (eV) | $O_{\text{adsorbed}}$ (eV) | $O_{\text{vacancy}}$ (eV) | $O_{\text{lattice}}$ (eV) | $(O_{\text{adsorbed}}+O_{\text{vacancy}})/O_{\text{lattice}}$ |
|-----------------------|----------------------------|----------------------------|---------------------------|---------------------------|---------------------------------------------------------------|
| NSC                   | 532.85                     | 531.19                     | 529.25                    | 528.63                    | 3.14                                                          |
| NSC <sub>0.05</sub> C | 532.90                     | 531.08                     | 529.31                    | 528.38                    | 3.29                                                          |
| NSC <sub>0.1</sub> C  | 532.72                     | 531.20                     | 529.34                    | 528.54                    | 3.35                                                          |
| NSC <sub>0.15</sub> C | 532.92                     | 531.20                     | 529.12                    | 528.50                    | 3.32                                                          |
| NSC <sub>0.2</sub> C  | 532.94                     | 531.25                     | 529.38                    | 528.58                    | 3.30                                                          |

Table S3 Power density of NSC and NSC<sub>0.1</sub>C in range of 800-650 °C

| Sample               | 800°C(mW.cm <sup>-2</sup> ) | 750°C(mW.cm <sup>-2</sup> ) | 700°C(mW.cm <sup>-2</sup> ) | 650°C(mW.cm <sup>-2</sup> ) |
|----------------------|-----------------------------|-----------------------------|-----------------------------|-----------------------------|
| NSC                  | 391.03                      | 296.30                      | 263.25                      | 187.85                      |
| NSC <sub>0.1</sub> C | 409.31                      | 321.40                      | 268.69                      | 192.44                      |
